# Supplementary material for: Age-associated microenvironmental changes highlight the role of PDGF-C in ER+ breast cancer metastatic relapse
Source: PubMed Central journal article supplement (PMC10132974; doi:10.1038/s43018-023-00525-y), 2023-03-13
Supplement: 43018_2023_525_MOESM1_ESM.pdf [file 43018_2023_525_MOESM1_ESM.pdf]

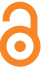

---

# Age-associated microenvironmental changes highlight the role of PDGF-C in ER<sup>+</sup> breast cancer metastatic relapse

---

In the format provided by the authors and unedited

---

## **Supplementary Information**

### **Supplementary Tables 1-6**

Supplementary Table 1. | Antibodies and dilutions

Supplementary Table 2. | shRNA glycerol stocks

Supplementary Table 3. | RT-qPCR Taqman probes

Supplementary Table 4. | TSAE1 tumour signature

Supplementary Table 5. | Fibroblast activation signature

Supplementary Table 6. | Fibrosis Signature

### **Supplementary Figures**

Supplementary Figure 1. | Example of FACS gating strategy to sort mCherry+ tumour cells from tissues.

Supplementary Figure 2. | Example of FACS gating strategy to sort cell populations from lungs.

**Supplementary Table 1. | Antibodies and dilutions**

| Antibody                                 | Product code  | Company                  | Dilution | Application    |
|------------------------------------------|---------------|--------------------------|----------|----------------|
| Anti-mouse CD16/CD31 (Fc receptor block) | 14-0161-82    | eBioscience              | 1:100    | FACS           |
| CD140a APA5 (BV605 conjugated)           | 135916        | BioLegend                | 1:200    | FACS           |
| CD31 390 (BV711 conjugated)              | 102449        | BioLegend                | 1:400    | FACS           |
| CD326 G8.8 (APC/Cy7 conjugated)          | 118218        | BioLegend                | 1:250    | FACS           |
| CD45 30-F11 (PE Cy7 conjugated)          | 103114        | BioLegend                | 1:500    | FACS           |
| F4/80 Cl:A3-1 (AF647 conjugated)         | MCA497A647    | Bio-Rad                  | 1:100    | FACS           |
| Actin (Smooth Muscle) (1A4)              | A2547         | Sigma                    | 1:5,000  | IF             |
| Endomucin (V7C7)                         | sc-65495      | Santa Cruz               | 1:1,000  | IF             |
| Endosialin (P13)                         | -             | In-house                 | 1:500    | IF             |
| HMGA2                                    | PA521320      | Thermo Fisher Scientific | 1:300    | IF             |
| Lamin A + Lamin C [EPR4100]              | ab108595      | Abcam                    | 1:1,000  | IF             |
| PDGF-C                                   | TA351509      | Origene                  | 1:100    | IF             |
| Goat-anti-Mouse-IgG2a-488                | A21131        | Thermo Fisher Scientific | 1:1,000  | IF             |
| Goat-anti-Rabbit-Ig-488                  | A11134        | Thermo Fisher Scientific | 1:1,000  | IF             |
| Goat-anti-Rabbit-Ig-555                  | A21429        | Thermo Fisher Scientific | 1:1,000  | IF             |
| Goat-anti-Rat-555                        | A21434        | Thermo Fisher Scientific | 1:1,000  | IF             |
| Actin (Smooth Muscle) (1A4)              | M0851         | Agilent DAKO             | 1:800    | IHC            |
| Actin (Smooth Muscle) (1A4)              | M0851         | Agilent DAKO             | 1:1,600  | IHC + ISH      |
| ERalpha 6F11                             | NCL-L-ER-6F11 | Leica Biosystems         | 1:40     | IHC            |
| F4/80 Cl:A3-1                            | MCA497        | Bio-Rad                  | 1:100    | IHC            |
| Firefly luciferase                       | ab181640      | Abcam                    | 1:100    | IHC            |
| Lamin A + Lamin C (human) [EPR4100]      | ab108595      | Abcam                    | 1:750    | IHC            |
| PDGF-C                                   | AF1447        | Bio-Techne               | 20 µg    | <i>In vivo</i> |
| Goat IgG control                         | AB-108-C      | Bio-Techne               | 20 µg    | <i>In vivo</i> |

|                                                             |          |                          |          |    |
|-------------------------------------------------------------|----------|--------------------------|----------|----|
| Akt                                                         | 9272     | Cell Signaling           | 1:1,000  | WB |
| p44/42 MAPK (Erk1/2) (137F5)                                | 4695     | Cell Signaling           | 1:1,000  | WB |
| PDGF Receptor $\alpha$ (D1E1E) XP                           | 3174     | Cell Signaling           | 1:1,000  | WB |
| Phospho-p44/42 MAPK (Erk1/2) (Thr202/Tyr204) (D13.14.4E) XP | 4370     | Cell Signaling           | 1:2,000  | WB |
| Phospho-Akt (Ser473)                                        | 9271     | Cell Signaling           | 1:1,000  | WB |
| Phospho-PDGF Receptor $\alpha$ (Tyr 754)                    | 441008G  | Thermo Fisher Scientific | 1:1,000  | WB |
| Phospho-S6 Ribosomal Protein (Ser235/236) (D57.2.2E) XP     | 4858     | Cell Signaling           | 1:2,000  | WB |
| S6 Ribosomal Protein (5G10)                                 | 2217     | Cell Signaling           | 1:1,000  | WB |
| Vinculin [EPR20407]                                         | ab219649 | Abcam                    | 1:1,000  | WB |
| Goat anti-Rabbit IgG (H+L)-HRP                              | ab205718 | Abcam                    | 1:10,000 | WB |

---

FACS, Fluorescence activated cell sorting; IF, immunofluorescence; IHC, immunohistochemistry; ISH, *in situ* hybridisation; WB, Western blotting

**Supplementary Table 2. | shRNA glycerol stocks (Sigma)**

| Product code   | Target                | Name     |
|----------------|-----------------------|----------|
| SHC002         | Non-targeting control | shNTC1   |
| SHC202         | Non-targeting control | shNTC2   |
| TRCN0000313940 | <i>Pdgfc</i>          | shPdgfc1 |
| TRCN0000317595 | <i>Pdgfc</i>          | shPdgfc5 |
| TRCN0000118191 | <i>PDGFC</i>          | shPDGFC2 |
| TRCN0000331695 | <i>PDGFC</i>          | shPDGFC5 |

**Supplementary Table 3. | RT-qPCR Taqman probes (Applied Biosystems)**

| Gene          | Product code  |
|---------------|---------------|
| <i>B2m</i>    | Mm00437762_m1 |
| <i>Ipo8</i>   | Mm01255158_m1 |
| <i>Ubc</i>    | Mm01201237_m1 |
| <i>18s</i>    | Hs99999901_s1 |
| <i>B2M</i>    | Hs99999907_m1 |
| <i>IPO8</i>   | Hs00183533_m1 |
| <i>UBC</i>    | Hs00824723_m1 |
| <i>Esr1</i>   | Mm00433149_m1 |
| <i>Greb1</i>  | Mm00479269_m1 |
| <i>Pdgfa</i>  | Mm01205760_m1 |
| <i>Pdgfb</i>  | Mm00440677_m1 |
| <i>Pdgfc</i>  | Mm00480205_m1 |
| <i>Pdgfd</i>  | Mm00546829_m1 |
| <i>Pdgfra</i> | Mm00440701_m1 |
| <i>PDGFA</i>  | Hs00234994_m1 |
| <i>PDGFB</i>  | Hs00966522_m1 |
| <i>PDGFC</i>  | Hs00211916_m1 |
| <i>PDGFD</i>  | Hs00228671_m1 |
| <i>PDGFRA</i> | Hs00998018_m1 |

**Supplementary Table 4. | TSAE1 tumour signature**

---

*B4galnt3*

*Bcat1*

*Cldn9*

*Clec2f*

*Csf3*

*Cwh43*

*Dlx2*

*Dmrta2*

*Dynap*

*Fosl1*

*Gjb4*

*Gm14137*

*Gpa33*

*Hmga2*

*Hoxa10*

*Il24*

*Klk6*

*Krt14*

*Krt16*

*Lypd3*

*Mettl7b*

*Mmp10*

*Nol4*

*Pax3*

*Pax6*

*Pkp1*

*Prl2c2*

*Ptpmt1*

*Rgs20*

*Rnf183*

*Serpinb5*

*Syt8*

*Tmprss11e*

*Wnt10a*

*Zic2*

**Supplementary Table 5. | Fibroblast activation signature**

---

|                |                 |                 |                  |
|----------------|-----------------|-----------------|------------------|
| <i>Acta2</i>   | <i>Egfr</i>     | <i>Myc</i>      | <i>Sgpl1</i>     |
| <i>Akap12</i>  | <i>Egr1</i>     | <i>Ndufs4</i>   | <i>Sirt6</i>     |
| <i>Akt1</i>    | <i>Emd</i>      | <i>Nf1</i>      | <i>Ski</i>       |
| <i>Anxa2</i>   | <i>Ereg</i>     | <i>Ngfr</i>     | <i>Slc8a1</i>    |
| <i>Appl1</i>   | <i>Esr1</i>     | <i>Nlrc3</i>    | <i>Sphk1</i>     |
| <i>Appl2</i>   | <i>Fap</i>      | <i>Nov</i>      | <i>Tgfb1</i>     |
| <i>Aqp1</i>    | <i>Fbxo4</i>    | <i>Nupr1</i>    | <i>Thbs1</i>     |
| <i>Arhgap4</i> | <i>Fer</i>      | <i>Pak1</i>     | <i>Thy1</i>      |
| <i>Arhgef7</i> | <i>Fgf10</i>    | <i>Pak3</i>     | <i>Tmem156</i>   |
| <i>Arid5b</i>  | <i>Fgf2</i>     | <i>Parp1</i>    | <i>Tmem201</i>   |
| <i>B4galt7</i> | <i>Fgr</i>      | <i>Parp10</i>   | <i>Tnc</i>       |
| <i>Bag4</i>    | <i>Fn1</i>      | <i>Pawr</i>     | <i>Tns1</i>      |
| <i>Bax</i>     | <i>Fos</i>      | <i>Pdcd4</i>    | <i>Trim32</i>    |
| <i>Bmi1</i>    | <i>Fosl2</i>    | <i>Pdgfa</i>    | <i>Trp53</i>     |
| <i>Btc</i>     | <i>Fth1</i>     | <i>Pdgfb</i>    | <i>Trp53inp1</i> |
| <i>Car12</i>   | <i>Fxyd3</i>    | <i>Pdgfc</i>    | <i>Ulk3</i>      |
| <i>Ccl2</i>    | <i>Gas6</i>     | <i>Pdgfd</i>    | <i>Wapl</i>      |
| <i>Ccna2</i>   | <i>Gclc</i>     | <i>Pdgfra</i>   | <i>Wdpcp</i>     |
| <i>Ccnb1</i>   | <i>Gclm</i>     | <i>Pdgfrb</i>   | <i>Wnt1</i>      |
| <i>Cd300a</i>  | <i>Gem</i>      | <i>Pdlim1</i>   | <i>Wnt2</i>      |
| <i>Cd74</i>    | <i>Gna12</i>    | <i>Pex2</i>     | <i>Wnt5a</i>     |
| <i>Cdc6</i>    | <i>Gstp1</i>    | <i>Pip5k1a</i>  | <i>Wnt7b</i>     |
| <i>Cdc73</i>   | <i>Has1</i>     | <i>Pla2g1b</i>  | <i>Zfand5</i>    |
| <i>Cdk4</i>    | <i>Hyal2</i>    | <i>Plau</i>     | <i>Zmiz1</i>     |
| <i>Cdk6</i>    | <i>Igf1</i>     | <i>Pml</i>      | <i>Zmpste24</i>  |
| <i>Cdkn1a</i>  | <i>Il17ra</i>   | <i>Pparg</i>    |                  |
| <i>Cln3</i>    | <i>Ilk</i>      | <i>Prkce</i>    |                  |
| <i>Col6a1</i>  | <i>Iqgap1</i>   | <i>Prkdc</i>    |                  |
| <i>Col6a2</i>  | <i>Itgb1</i>    | <i>Prr5l</i>    |                  |
| <i>Coro1c</i>  | <i>Itgb1bp1</i> | <i>Ptk2</i>     |                  |
| <i>Creb1</i>   | <i>Jun</i>      | <i>Rab3b</i>    |                  |
| <i>Ctc1</i>    | <i>Krt17</i>    | <i>Rb1</i>      |                  |
| <i>Cthrc1</i>  | <i>Lamtor2</i>  | <i>Rcc2</i>     |                  |
| <i>Ctnnb1</i>  | <i>Lep</i>      | <i>Rffl</i>     |                  |
| <i>Ctsk</i>    | <i>Lig4</i>     | <i>Rgcc</i>     |                  |
| <i>Cygb</i>    | <i>Med25</i>    | <i>Rnaseh2b</i> |                  |
| <i>Dab2ip</i>  | <i>Med31</i>    | <i>Rps6ka1</i>  |                  |
| <i>Dach1</i>   | <i>Mif</i>      | <i>S100a4</i>   |                  |
| <i>Ddr2</i>    | <i>Mmp9</i>     | <i>S100a6</i>   |                  |
| <i>Dhx9</i>    | <i>Morc3</i>    | <i>Sdc4</i>     |                  |
| <i>Dmtn</i>    | <i>Mta2</i>     | <i>Sesn2</i>    |                  |
| <i>E2f1</i>    | <i>Myb</i>      | <i>Sfrp1</i>    |                  |

**Supplementary Table 6. | Fibrosis Signature**

---

|                |                |
|----------------|----------------|
| <i>Acvr1</i>   | <i>Gusb</i>    |
| <i>Adam9</i>   | <i>Hpgd</i>    |
| <i>Arrb1</i>   | <i>Igf1</i>    |
| <i>Axl</i>     | <i>Ikbkb</i>   |
| <i>Bax</i>     | <i>Isyna1</i>  |
| <i>C3ar1</i>   | <i>Itgb3</i>   |
| <i>C6</i>      | <i>Itm2c</i>   |
| <i>Cav2</i>    | <i>Kcnn4</i>   |
| <i>Cavin2</i>  | <i>Lama3</i>   |
| <i>Ccr1</i>    | <i>Lgmn</i>    |
| <i>Cd68</i>    | <i>Lifr</i>    |
| <i>Cdc14b</i>  | <i>Loxl2</i>   |
| <i>Cdkn1a</i>  | <i>Lrrc32</i>  |
| <i>Cdon</i>    | <i>Masp1</i>   |
| <i>Col14a1</i> | <i>Mme</i>     |
| <i>Col1a1</i>  | <i>Mmp12</i>   |
| <i>Col1a2</i>  | <i>Mmp16</i>   |
| <i>Col4a2</i>  | <i>Mmp8</i>    |
| <i>Col5a1</i>  | <i>Ms4a2</i>   |
| <i>Col5a3</i>  | <i>Myd88</i>   |
| <i>Cpxm2</i>   | <i>Ncam1</i>   |
| <i>Csf1r</i>   | <i>Ncf1</i>    |
| <i>Ctsb</i>    | <i>Osbp15</i>  |
| <i>Ctsd</i>    | <i>Peli1</i>   |
| <i>Ctsk</i>    | <i>Pros1</i>   |
| <i>Cxcl12</i>  | <i>Ptpn1</i>   |
| <i>Dclk1</i>   | <i>Tgfr2</i>   |
| <i>Dpysl3</i>  | <i>Thbs2</i>   |
| <i>Emp2</i>    | <i>Timp1</i>   |
| <i>Erp29</i>   | <i>Tmem100</i> |
| <i>Evl</i>     | <i>Tpsb2</i>   |
| <i>Fabp4</i>   | <i>Trib3</i>   |
| <i>Fap</i>     | <i>Tspan12</i> |
| <i>Fasn</i>    | <i>Vegfa</i>   |
| <i>Fgg</i>     |                |
| <i>Fhl2</i>    |                |
| <i>Flt1</i>    |                |
| <i>Fst</i>     |                |
| <i>Fzd5</i>    |                |
| <i>Gdf15</i>   |                |
| <i>Grem1</i>   |                |



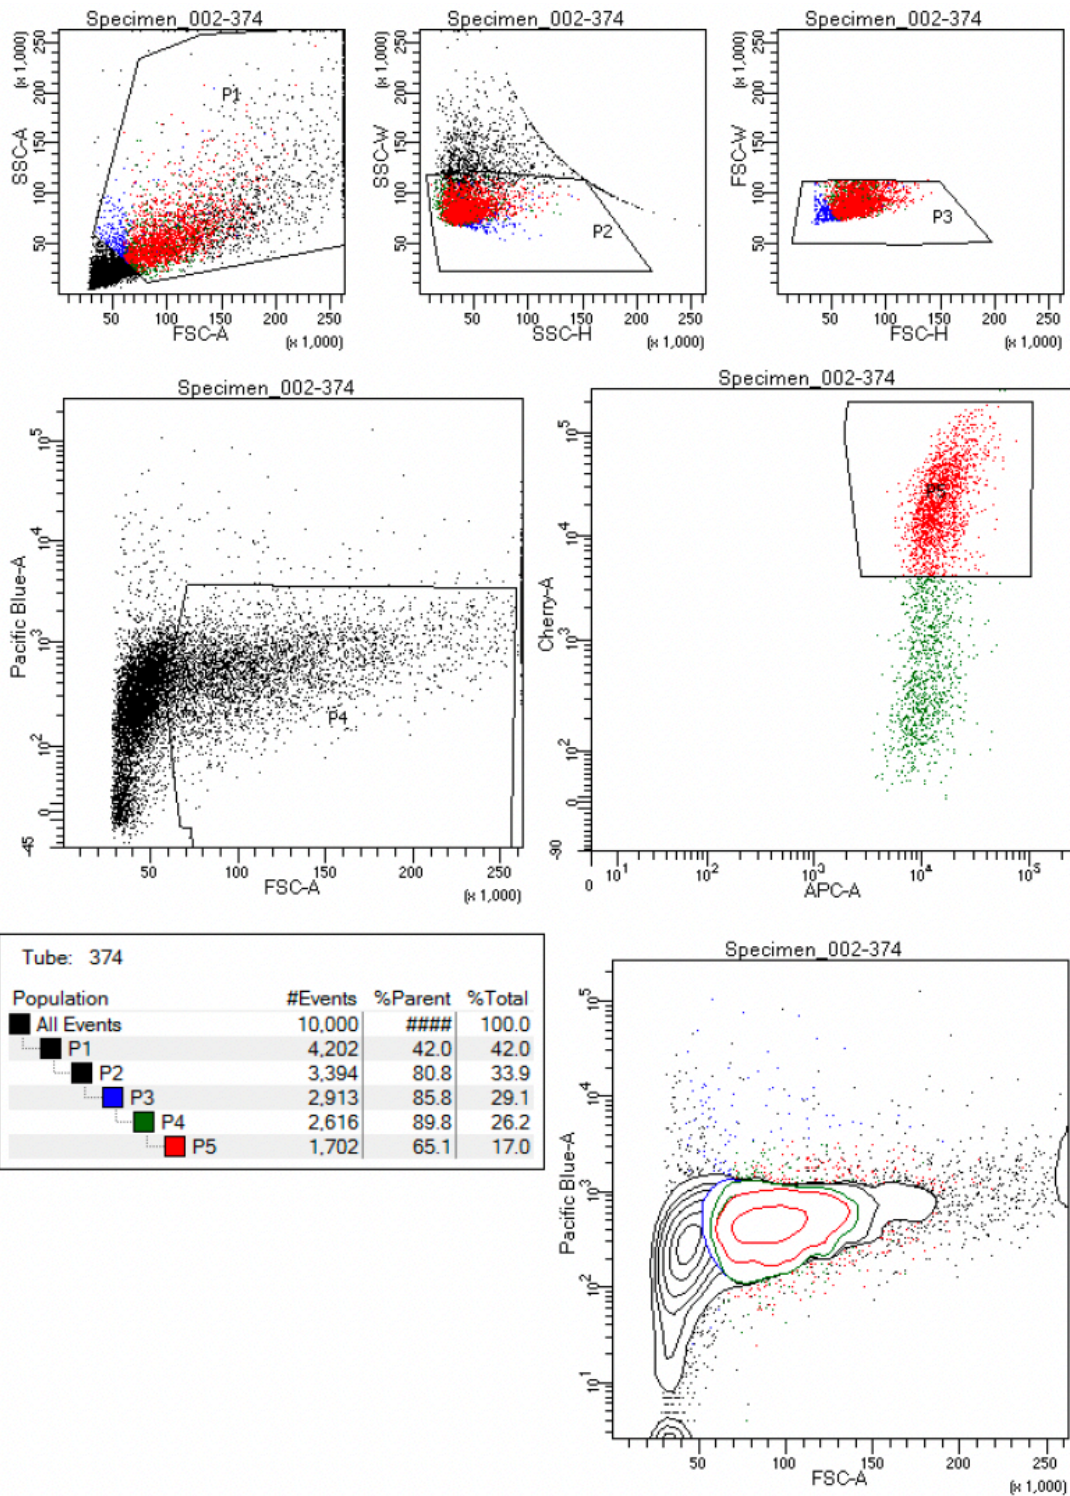

**Supplementary Figure 1. | Example of FACS gating strategy to sort mCherry+ tumour cells from tissues.** Associated with Fig. 3i,j. Samples were gated to exclude cellular debris (FSC-A/SSC-A) and then SSC-H/SSC-W and FSC-H/FSC-W gates were used to discriminate doublets. DAPI was used to identify the live cell population. The tumour cell line (untagged and mChLuc2-tagged) cultured *in vitro* was used to set the mCherry gate.

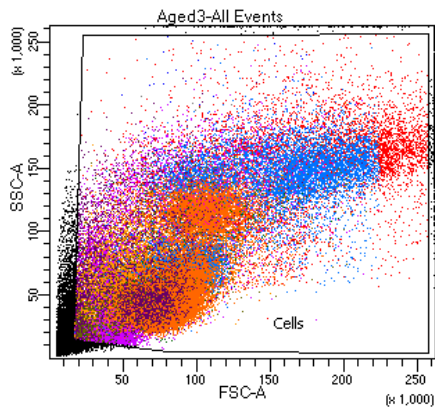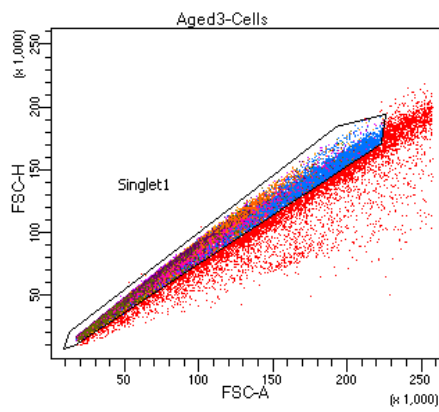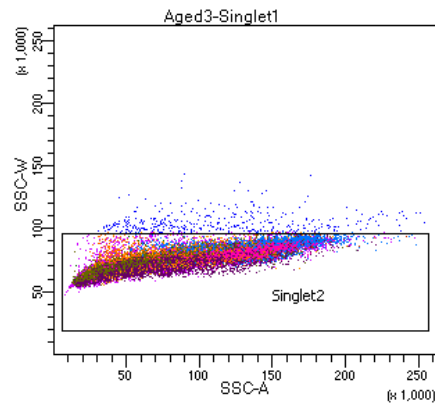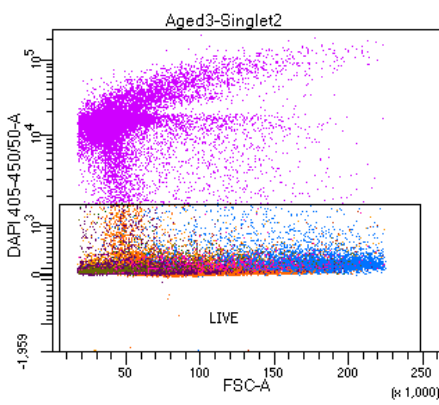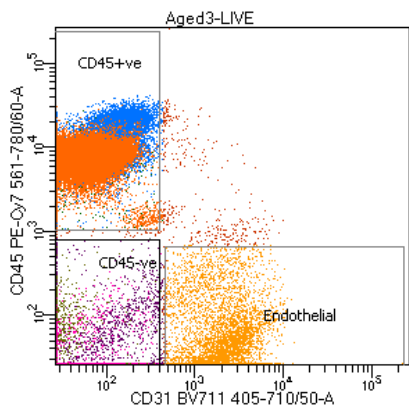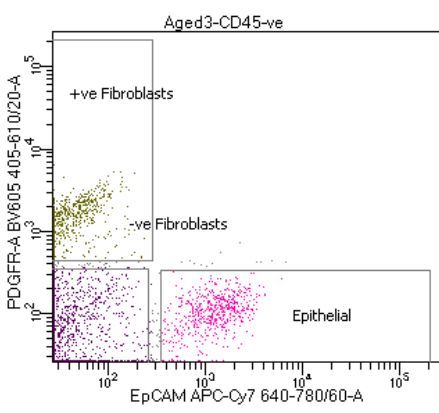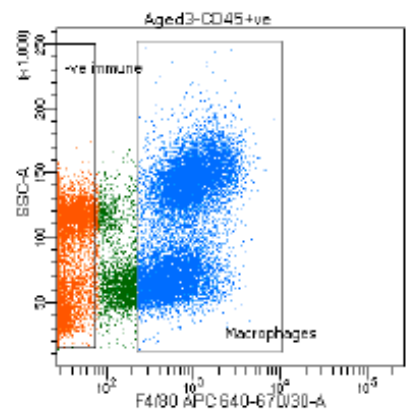

Tube: Aged3

| Population      | #Events | %Parent | %Total |
|-----------------|---------|---------|--------|
| All Events      | 109,196 | ###     | 100.0  |
| Cells           | 100,000 | 91.6    | 91.6   |
| Singlet1        | 93,876  | 93.9    | 86.0   |
| Singlet2        | 93,503  | 99.6    | 85.6   |
| LIVE            | 78,703  | 84.2    | 72.1   |
| Endothelial     | 10,780  | 13.7    | 9.9    |
| CD45-ve         | 5,340   | 6.8     | 4.9    |
| -ve Fibroblasts | 3,651   | 68.4    | 3.3    |
| +ve Fibroblasts | 1,009   | 18.9    | 0.9    |
| Epithelial      | 561     | 10.5    | 0.5    |
| CD45+ve         | 61,864  | 78.6    | 56.7   |
| Macrophages     | 13,317  | 21.5    | 12.2   |
| -ve immune      | 46,521  | 75.2    | 42.6   |

**Supplementary Figure 2. | Example of FACS gating strategy to sort cell populations from aged lung.** Associated with Extended Data Fig. 3c. Samples were gated to exclude cellular debris (FSC-A/SSC-A) and then SSC-A/SSC-W and FSC-A/FSC-W gates were used to discriminate doublets. DAPI was used to identify the live cell population. Cell populations were sorted as follows: CD45<sup>+</sup> F4/80<sup>-</sup> (F4/80 negative immune cells); CD45<sup>+</sup> F4/80<sup>+</sup> (macrophages); CD45<sup>-</sup> CD31<sup>+</sup> (endothelial cells); CD45<sup>-</sup> CD31<sup>-</sup> EpCAM<sup>+</sup> (epithelial cells); CD45<sup>-</sup>, CD31<sup>-</sup>, EpCAM<sup>-</sup>, PDGFR $\alpha$ <sup>-</sup> (PDGFR $\alpha$ <sup>-</sup> fibroblasts); CD45<sup>-</sup>, CD31<sup>-</sup>, EpCAM<sup>-</sup>, PDGFR $\alpha$ <sup>+</sup> (PDGFR $\alpha$ <sup>+</sup> fibroblasts).
