# Supplementary material for: Age-associated microenvironmental changes highlight the role of PDGF-C in ER+ breast cancer metastatic relapse
Source: PubMed Central journal article supplement (PMC10132974; doi:10.1038/s43018-023-00525-y), 2023-03-13

# Western blots from Fig. 5b

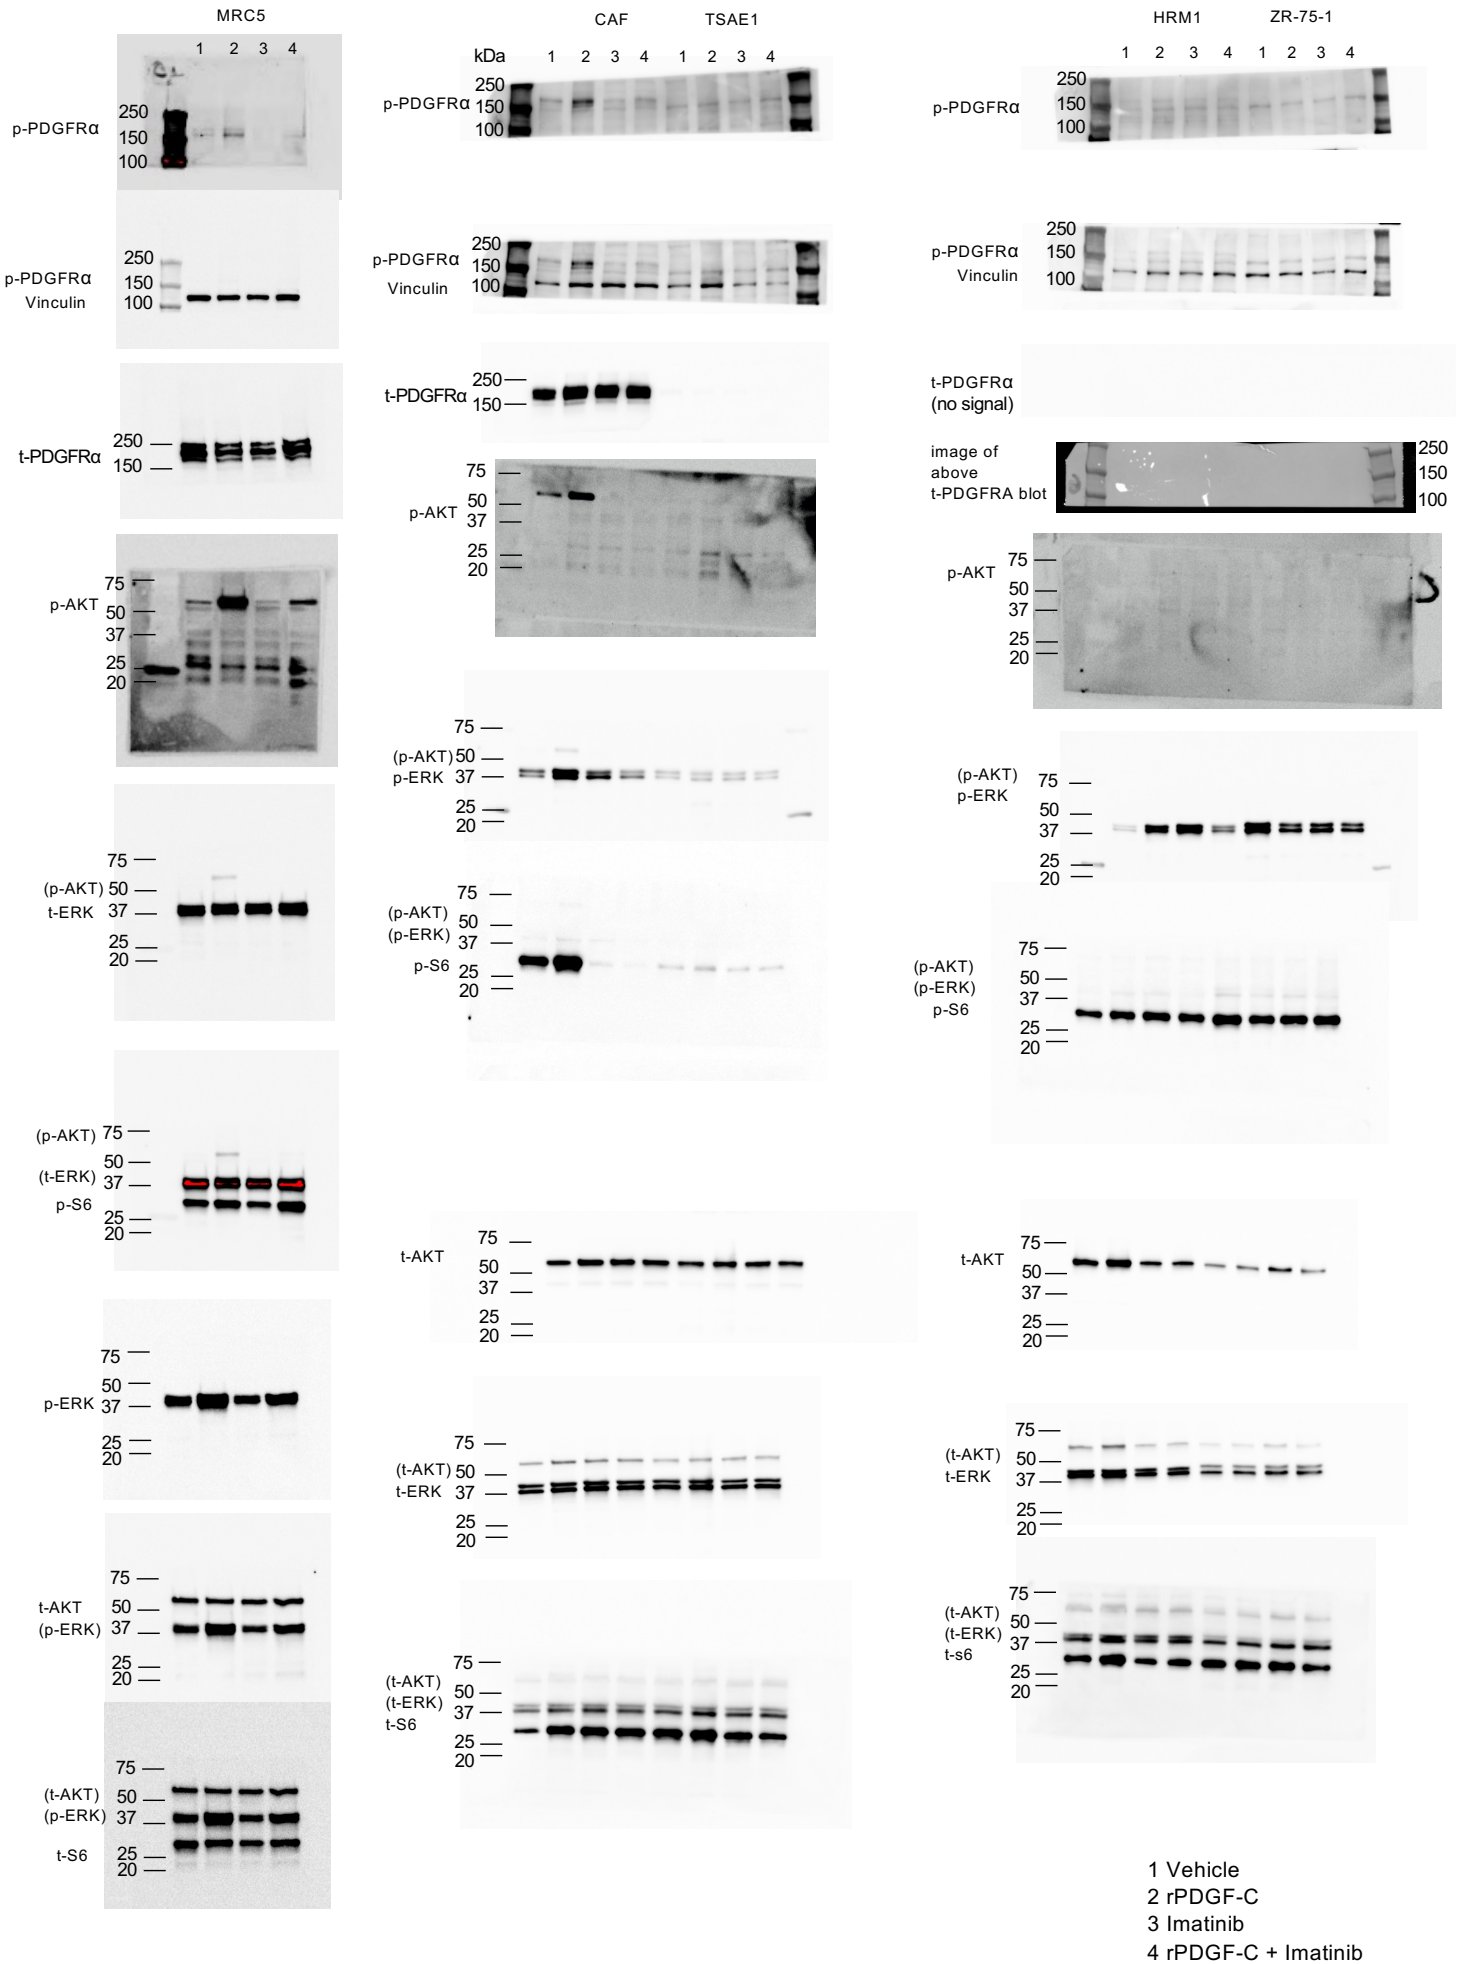

Supplement: 43018_2023_525_MOESM4_ESM.pdf [file 43018_2023_525_MOESM4_ESM.pdf]
